# Supplementary material for: Inhibition of Sec61-dependent translocation by mycolactone uncouples the integrated stress response from ER stress, driving cytotoxicity via translational activation of ATF4
Source: PubMed Central journal article supplement (PMC5852046; doi:10.1038/s41419-018-0427-y), 2018-03-14
Supplement: 41419_2018_427_MOESM2_ESM.pdf [file 41419_2018_427_MOESM2_ESM.pdf]

| Probe         | System             | Name      | Description                                                              | LPS A   | LPS B   | LPS C   | LPS+MYC A | LPS+MYC B | LPS+MYC C | P value  | Fold Change |
|---------------|--------------------|-----------|--------------------------------------------------------------------------|---------|---------|---------|-----------|-----------|-----------|----------|-------------|
| A_51_P112355  | NM_018738          | Igtp      | Interferon gamma induced GTPase                                          | 0.1607  | 0.7470  | 1.4270  | -0.5954   | -1.3120   | -1.2121   | 0.00E+00 | 0.2836      |
| A_55_P2114953 | NM_011909          | Usp18     | Ubiquitin specific peptidase 18                                          | 0.8523  | 0.9878  | 1.7421  | 0.5391    | -1.3649   | -0.9769   | 0.00E+00 | 0.2882      |
| A_51_P112355  | NM_018738          | Igtp      | Interferon gamma induced GTPase                                          | 0.1037  | 0.7102  | 1.4358  | -0.4592   | -1.3011   | -1.2270   | 3.92E-07 | 0.2982      |
| A_51_P112355  | NM_018738          | Igtp      | Interferon gamma induced GTPase                                          | 0.0837  | 0.6939  | 1.4135  | -0.5021   | -1.2144   | -1.3127   | 0.00E+00 | 0.2993      |
| A_51_P112355  | NM_018738          | Igtp      | Interferon gamma induced GTPase                                          | 0.1375  | 0.7182  | 1.4463  | -0.3965   | -1.2288   | -1.2063   | 3.92E-07 | 0.3054      |
| A_51_P112355  | NM_018738          | Igtp      | Interferon gamma induced GTPase                                          | 0.1501  | 0.6873  | 1.4497  | -0.4263   | -1.2079   | -1.1430   | 7.84E-07 | 0.3103      |
| A_51_P112355  | NM_018738          | Igtp      | Interferon gamma induced GTPase                                          | 0.1309  | 0.7202  | 1.3765  | -0.4425   | -1.1733   | -1.2199   | 7.84E-07 | 0.3104      |
| A_51_P112355  | NM_018738          | Igtp      | Interferon gamma induced GTPase                                          | 0.1050  | 0.6743  | 1.3906  | -0.4948   | -1.2290   | -1.1335   | 7.84E-07 | 0.3130      |
| A_51_P112355  | NM_018738          | Igtp      | Interferon gamma induced GTPase                                          | 0.1398  | 0.7003  | 1.3984  | -0.3405   | -1.2099   | -1.2207   | 7.84E-07 | 0.3143      |
| A_52_P670026  | NM_021384          | Rsad2     | radical S-adenosyl methionine domain containing 2                        | 0.7112  | 0.2806  | 1.3274  | 0.5668    | -2.0188   | -1.2336   | 3.92E-07 | 0.3146      |
| A_51_P112355  | NM_018738          | Igtp      | Interferon gamma induced GTPase                                          | 0.1267  | 0.7302  | 1.3077  | -0.4275   | -1.2082   | -1.1764   | 7.84E-07 | 0.3167      |
| A_51_P112355  | NM_018738          | Igtp      | Interferon gamma induced GTPase                                          | 0.0914  | 0.7087  | 1.3816  | -0.3752   | -1.2360   | -1.0664   | 1.18E-06 | 0.3254      |
| A_52_P186937  | NM_020557          | Tyki      | Thymidylate kinase family LPS-inducible                                  | 0.9568  | 0.0840  | 0.9786  | 0.5701    | -1.8496   | -1.3197   | 3.92E-07 | 0.3440      |
| A_51_P359570  | NM_010501          | Ifit3     | Interferon-induced protein with tetra-ricopeptide repeats 3              | -0.3501 | -0.3977 | 0.1812  | -0.6658   | -2.1139   | -2.2685   | 3.53E-06 | 0.3551      |
| A_55_P2056521 | NM_019647          | Rpl21     | ribosomal protein L21                                                    | 0.2118  | -0.2851 | -0.7696 | -1.7876   | -1.6301   | -1.5501   | 7.45E-06 | 0.3856      |
| A_55_P1999805 | A_55_P1999805      | Gm8172    | ribosomal protein S6 pseudogene                                          | 0.0112  | -0.0746 | -0.4504 | -1.5596   | -1.6426   | -1.2463   | 1.69E-05 | 0.4029      |
| A_55_P2004370 | NM_009802          | Car6      | Carbonic anhydrase                                                       | -0.2242 | -0.3221 | -0.1970 | -2.0947   | -1.3996   | -1.1003   | 2.82E-05 | 0.4107      |
| A_55_P2082609 | NAP113743-1        | Unknown   | Unknown                                                                  | 0.4717  | 0.2331  | 0.4862  | -1.3403   | -0.9261   | -0.3281   | 3.41E-05 | 0.4170      |
| A_55_P2072841 | A_55_P2072841      | Rpl17-ps7 | ribosomal protein L17, pseudogene 7                                      | 0.2386  | -0.6234 | -1.0117 | -1.4292   | -1.9996   | -1.7231   | 1.72E-05 | 0.4199      |
| A_55_P2145257 | NAP102544-1        | Unknown   | Unknown                                                                  | 0.0070  | -0.3510 | -0.3521 | -1.8141   | -1.5589   | -1.0757   | 3.37E-05 | 0.4202      |
| A_55_P1993758 | NM_021552          | Nsa2      | NSA2 ribosome biogenesis homolog                                         | 0.4270  | 0.2565  | 0.5862  | -1.2988   | -0.9176   | -0.1992   | 4.35E-05 | 0.4268      |
| A_55_P1975447 | NAP111403-1        | Unknown   | Unknown                                                                  | 0.3785  | 0.2407  | 0.3713  | -1.3056   | -1.0796   | -0.3057   | 4.39E-05 | 0.4272      |
| A_55_P1998461 | NM_001002239       | Rpl17     | Similar to Rpl17 protein                                                 | 0.1612  | -0.6754 | -1.0677 | -1.4722   | -2.0383   | -1.7374   | 2.66E-05 | 0.4287      |
| A_55_P2066578 | BC010546           | Ifi204    | Interferon inducible gene 204                                            | -1.0596 | -0.5439 | 0.5016  | -1.2622   | -1.6895   | -1.7820   | 8.62E-05 | 0.4321      |
| A_55_P1998416 | NM_001271676       | Ifi47     | Interferon inducible gene 47                                             | 0.2864  | -0.1034 | 1.0731  | -0.0273   | -1.3795   | -0.9344   | 6.43E-05 | 0.4355      |
| A_66_P111689  | XM_001003736       | Gm9372    | ribosomal S28 homologue                                                  | 0.0845  | -0.7786 | -1.0878 | -1.3637   | -2.1231   | -1.8681   | 2.47E-05 | 0.4380      |
| A_55_P2008567 | NM_009096          | Rps6      | Ribosomal protein S6                                                     | -0.0458 | -0.1516 | -0.4626 | -1.4413   | -1.6427   | -1.1480   | 3.84E-05 | 0.4381      |
| A_55_P2145531 | NM_138670          | Mpst      | Mercaptopyruvate sulfurtransferase                                       | -0.1022 | 0.3645  | -0.0793 | -1.4314   | -1.0264   | -0.8576   | 6.07E-05 | 0.4456      |
| A_66_P111433  | A_66_P111433       | Gm6027    | Predicted gene                                                           | 0.1874  | 0.2663  | 0.4242  | -1.0450   | -1.1410   | -0.4035   | 6.43E-05 | 0.4488      |
| A_55_P2171746 | NAP112785-1        | Unknown   | Unknown                                                                  | 0.3462  | 0.3673  | 0.7161  | -1.1413   | -0.8775   | -0.0003   | 9.25E-05 | 0.4508      |
| A_51_P232858  | NM_025974          | Rpl14     | Transcribed locus, weakly similar to XP_001058222.1 similar to ribosomal | 0.2306  | -0.0182 | -0.7473 | -1.3165   | -1.4476   | -1.2147   | 6.86E-05 | 0.4513      |
| A_55_P2072842 | A_55_P2072842      | Rpl17-ps7 | ribosomal protein L17, pseudogene 7                                      | 0.1410  | -0.7959 | -1.0540 | -1.4027   | -2.0425   | -1.6931   | 4.39E-05 | 0.4528      |
| A_55_P2151863 | A_55_P2151863      | Gm7599    | psuedogene                                                               | 0.2921  | 0.3300  | 0.7244  | -1.2574   | -0.8422   | 0.0203    | 1.09E-04 | 0.4532      |
| A_55_P2076134 | A_55_P2076134      | Rpl21     | ribosomal protein L21                                                    | 0.2298  | -0.5884 | -1.0100 | -1.7043   | -1.7352   | -1.3431   | 1.10E-04 | 0.4544      |
| A_55_P2118740 | A_55_P2118740      | Gm15616   | psuedogene                                                               | 0.3086  | -0.2640 | -0.1810 | -1.5487   | -1.3103   | -0.5876   | 2.00E-04 | 0.4654      |
| A_66_P112573  | NM_020583          | Isg20     | Interferon stimulated gene 20                                            | -0.0755 | -0.4065 | 0.0335  | -1.0965   | -1.2884   | -1.3590   | 9.56E-05 | 0.4670      |
| A_55_P2130855 | ENSMUST00000110798 | Unknown   | psuedogene                                                               | 0.2695  | 0.1447  | 0.1482  | -1.2595   | -1.2008   | -0.2717   | 2.01E-04 | 0.4671      |
| A_55_P2176688 | A_55_P2176688      | Gm8748    | psuedogene                                                               | -0.4024 | -1.5197 | -1.8409 | -2.7707   | -2.3636   | -1.9202   | 2.15E-04 | 0.4674      |
| A_55_P2176212 | A_55_P2176212      | Unknown   | Unknown                                                                  | 0.0133  | -1.0401 | -1.0725 | -2.0974   | -2.0339   | -1.2587   | 2.32E-04 | 0.4675      |

|               |               |           |                                                             |         |         |         |         |         |         |          |        |
|---------------|---------------|-----------|-------------------------------------------------------------|---------|---------|---------|---------|---------|---------|----------|--------|
| A_55_P2000062 | NM_008390     | Irf1      | Interferon regulatory factor 1                              | 0.4614  | 0.3654  | 0.5388  | 0.1337  | -1.0870 | -0.9668 | 4.11E-05 | 0.4681 |
| A_51_P327751  | NM_008331     | Ifit1     | Interferon-induced protein with tetra-ricopeptide repeats 1 | 0.1783  | -0.3763 | 0.7555  | 0.2200  | -1.7962 | -1.1448 | 1.14E-04 | 0.4688 |
| A_55_P2149906 | XM_001479170  | Rps23     | ribosomal protein S23                                       | -0.3736 | -0.7865 | -0.9088 | -2.3144 | -1.6631 | -1.3614 | 2.77E-04 | 0.4698 |
| A_55_P2049365 | XR_168456     | Gm3201    | predicted gene                                              | -0.0660 | -0.3914 | -0.7353 | -1.8249 | -1.6369 | -0.9981 | 2.44E-04 | 0.4701 |
| A_55_P1968841 | A_55_P1968841 | Unknown   | Unknown                                                     | -0.3270 | -1.6776 | -2.0255 | -2.5976 | -2.4526 | -2.1723 | 2.18E-04 | 0.4783 |
| A_51_P490023  | NM_009450     | Tubb2a    | Tubulin beta 2A, Class IIA                                  | 0.2820  | 0.1295  | 0.6743  | -0.7181 | -1.0233 | -0.3646 | 1.19E-04 | 0.4783 |
| A_55_P2069176 | NAP014020-001 | Unknown   | Unknown                                                     | 0.0291  | -1.1729 | -1.2349 | -2.0830 | -2.0206 | -1.4597 | 3.02E-04 | 0.4791 |
| A_55_P2159094 | NM_019782     | Lepre1    | Leprecan 1                                                  | -0.4979 | -0.6018 | -0.8290 | -1.7286 | -1.6723 | -1.7053 | 1.32E-04 | 0.4799 |
| A_55_P2155572 | A_55_P2155572 | Rpl17-ps7 | ribosomal protein L17, pseudogene 7                         | -0.2061 | -1.5401 | -1.6993 | -2.0558 | -2.5140 | -2.0492 | 1.68E-04 | 0.4803 |
| A_66_P140976  | NM_025586     | Rpl15     | Ribosomal protein L15                                       | 0.4778  | 0.6141  | 0.1387  | -0.7343 | -0.7794 | -0.4179 | 1.67E-04 | 0.4816 |
| A_66_P133993  | XM_286185     | Rpl11     | 60S ribosomal protein L11                                   | 0.5249  | -0.4662 | -0.8485 | -1.0146 | -1.5280 | -1.3969 | 1.21E-04 | 0.4830 |
| A_55_P2154782 | NAP065441-1   | Unknown   | Unknown                                                     | 0.3134  | -0.1269 | -0.6768 | -1.1770 | -1.3398 | -1.1197 | 1.90E-04 | 0.4834 |
| A_55_P1998776 | A_55_P1998776 | Eef1a1    | Eukaryotic translation elongation factor1 alpha-like        | -0.2983 | -0.1824 | 0.6169  | -2.1793 | -0.9729 | 0.1503  | 1.32E-04 | 0.4843 |
| A_55_P2015177 | A_55_P2015177 | Nap1L1    | Nucleosome assembly protein 1-like-1                        | 0.6039  | 0.6183  | 0.8712  | -0.6299 | -0.7174 | 0.3209  | 2.63E-04 | 0.4863 |
| A_55_P1978770 | NM_001256311  | Unknown   | Predicted protein                                           | 0.0958  | -0.0451 | 0.0492  | -1.1880 | -1.0145 | -0.7982 | 2.31E-04 | 0.4885 |
| A_55_P2027906 | NM_021552     | Nsa2      | NSA2 ribosome biogenesis homolog                            | 0.4976  | 0.4984  | 0.9130  | -0.7255 | -0.5782 | 0.1294  | 2.64E-04 | 0.4905 |
| A_55_P2178023 | A_55_P2178023 | Unknown   | Unknown                                                     | 0.0102  | -1.0217 | -1.1999 | -1.9336 | -1.9730 | -1.3876 | 3.94E-04 | 0.4905 |
| A_55_P2029643 | XM_003946058  | Nsa2      | NSA2 ribosome biogenesis homolog                            | 0.2463  | 0.3259  | 0.7209  | -0.8954 | -0.8864 | 0.0076  | 2.54E-04 | 0.4923 |
| A_55_P2040031 | NAP062632-1   | Unknown   | Unknown                                                     | -0.1294 | -0.6181 | -0.2148 | -2.1620 | -1.3810 | -0.4837 | 5.32E-04 | 0.4926 |
| A_66_P107734  | DV047974      | Rpl17     | 60S ribosomal protein L17                                   | -0.3100 | -1.5789 | -1.6528 | -2.0877 | -2.4850 | -2.0319 | 3.01E-04 | 0.4928 |
| A_55_P1993761 | NM_021552     | Nsa2      | NSA2 ribosome biogenesis homolog                            | 0.3150  | 0.2918  | 0.5862  | -0.9315 | -0.8962 | -0.0339 | 2.88E-04 | 0.4937 |
| A_55_P2032559 | XR_142050     | Gm5075    | Predicted gene, EG432725                                    | -0.1131 | -1.0053 | -1.2380 | -2.1444 | -1.8128 | -1.4360 | 5.36E-04 | 0.4958 |
| A_55_P2008691 | A_55_P2008691 | Gm6392    | Pseudogene                                                  | -0.3264 | -0.2573 | 0.4726  | -1.9909 | -1.1204 | -0.0189 | 3.32E-04 | 0.4978 |
| A_55_P2109599 | NAP058895-1   | Unknown   | Unknown                                                     | 0.2296  | 0.3568  | 0.7202  | -0.9485 | -0.7907 | 0.0363  | 3.28E-04 | 0.4989 |
| A_55_P1995127 | A_55_P1995127 | Unknown   | Unknown                                                     | -0.1417 | -0.8646 | -1.3919 | -2.1055 | -1.7365 | -1.5607 | 5.24E-04 | 0.4995 |
| A_55_P2032167 | NM_008327     | Ifi202b   | Interferon activated gene 202B                              | 0.2316  | 0.4323  | 0.8636  | -0.0226 | -1.0109 | -0.4356 | 1.72E-04 | 0.5004 |
| A_55_P2044843 | NAP102896-1   | Unknown   | Unknown                                                     | -0.6344 | -1.2842 | -1.2322 | -2.2736 | -2.1801 | -1.6518 | 5.60E-04 | 0.5053 |
| A_55_P1961014 | NM_009150     | Selenbp1  | Selenium binding protein 1                                  | 0.8737  | 0.6340  | 0.7517  | -0.6667 | -0.1693 | 0.1415  | 6.42E-04 | 0.5053 |
| A_51_P262171  | NM_008326     | Irgm      | Immunity-related GTPase family, M                           | -0.7501 | -0.0025 | 0.4543  | -0.7991 | -1.1845 | -1.2608 | 2.81E-04 | 0.5063 |
