# Supplementary material for: Inhibition of Sec61-dependent translocation by mycolactone uncouples the integrated stress response from ER stress, driving cytotoxicity via translational activation of ATF4
Source: PubMed Central journal article supplement (PMC5852046; doi:10.1038/s41419-018-0427-y), 2018-03-14
Supplement: 41419_2018_427_MOESM3_ESM.pdf [file 41419_2018_427_MOESM3_ESM.pdf]

| Probe         | System             | Gene Name | Description                                                                                   | LPS A   | LPS B   | LPS C   | LPS+MYC A | LPS+MYC B | LPS+MYC C | P value  | Fold Change |
|---------------|--------------------|-----------|-----------------------------------------------------------------------------------------------|---------|---------|---------|-----------|-----------|-----------|----------|-------------|
| A_55_P2016459 | AK156907           | Cxcl10    | C-X-C motif chemokine 10                                                                      | -1.6316 | -2.7873 | -3.5608 | -0.0912   | 0.0039    | -0.5296   | 0.00E+00 | 5.4803      |
| A_51_P472901  | NM_008577          | Slc3a2    | Solute carrier family 3 (activators of dibasic and neutral amino acid transport), member 2    | -0.0053 | -0.0982 | 0.3439  | 2.6278    | 2.0382    | 2.3511    | 0.00E+00 | 4.7862      |
| A_55_P2115442 | NM_053109          | Clec2d    | C-type lectin domain family 2, member d                                                       | -2.1319 | -2.5187 | -3.4025 | -0.4584   | -0.7713   | -0.7941   | 0.00E+00 | 4.0272      |
| A_55_P2105858 | NM_030693          | Atf5      | Activating transcription factor 5                                                             | -0.1977 | -1.1628 | -0.3777 | 1.0697    | 0.7450    | 1.3211    | 3.53E-06 | 3.0837      |
| A_51_P519251  | NM_019738          | NupR1     | nuclear protein 1                                                                             | 0.2626  | -1.4497 | -1.3744 | 1.9072    | 0.0202    | 0.2095    | 2.74E-06 | 2.9611      |
| A_55_P1960936 | A_55_P1960936      | Accn1     | Accn1/Chr2 var 3 trans-spliced mRNA sequence                                                  | -2.5223 | -1.7763 | -0.4156 | -0.8481   | 0.1065    | 0.7030    | 1.45E-05 | 2.9455      |
| A_51_P241861  | NM_016921          | Tcirg1    | T-cell, immune regulator 1, ATPase, H+ transporting, lysosomal V0 protein A3                  | -0.5982 | -1.1494 | -0.2915 | 0.9865    | 0.4559    | 1.1728    | 1.37E-05 | 2.9312      |
| A_55_P1954092 | BB713741           | Unknown   | RIKEN full-length enriched, 2 cells egg Mus musculus cDNA clone B020049A06 3', mRNA sequence. | -2.5033 | -1.7437 | -0.3230 | -0.7664   | 0.0602    | 0.7295    | 1.80E-05 | 2.8901      |
| A_55_P2044932 | NM_030720          | Gpr84     | G protein-coupled receptor 84                                                                 | 0.2745  | 0.7347  | 1.5417  | 2.3656    | 2.2467    | 2.4230    | 4.31E-05 | 2.8183      |
| A_55_P2071952 | NM_178909          | Wdr92     | WD repeat domain 92                                                                           | -2.7097 | -1.8913 | -0.1521 | -1.0305   | -0.0763   | 0.7717    | 2.27E-05 | 2.7753      |
| A_55_P2029746 | AK132033           |           | non coding RNA                                                                                | -2.5927 | -1.7490 | -0.0373 | -0.8172   | -0.0147   | 0.8516    | 3.21E-05 | 2.7630      |
| A_51_P323880  | ENSMUST00000082405 | MT-CO2    | mitochondrially encoded cytochrome C oxidase II                                               | -5.2995 | -4.9392 | -4.4504 | -3.6812   | -3.4198   | -3.2211   | 4.31E-05 | 2.7428      |
| A_65_P07196   | ENSMUST00000082409 | MT-CO3    | mitochondrially encoded cytochrome C oxidase III                                              | -5.2556 | -4.5775 | -4.3923 | -3.5365   | -3.4753   | -2.8483   | 4.43E-05 | 2.7418      |
| A_55_P2140212 | TC1616199          | HypF      | Hydrogenase maturation factor F, partial                                                      | -2.6135 | -1.7556 | -0.1961 | -0.9143   | -0.0374   | 0.7447    | 4.39E-05 | 2.7373      |
| A_55_P1954724 | XR_104972          | Gm20186   | predicted gene                                                                                | -2.4893 | -1.6594 | -0.2415 | -0.7631   | 0.0612    | 0.6641    | 5.21E-05 | 2.7336      |
| A_51_P464238  | NM_009716          | Atf4      | Activating transcription factor 4                                                             | -1.3220 | -1.5070 | -1.4912 | 0.0339    | -0.0987   | 0.0718    | 2.04E-05 | 2.7177      |
| A_55_P1957213 | AK019465           | YBox3     | Y Box 3 protein, DNA binding                                                                  | -2.4754 | -1.6591 | -0.2449 | -0.7790   | 0.0294    | 0.6610    | 6.74E-05 | 2.6950      |
| A_51_P183812  | NM_011410          | Slfn4     | Schlafen 4                                                                                    | -3.0403 | -3.0561 | -3.7383 | -1.6475   | -1.9020   | -2.0595   | 2.12E-05 | 2.6547      |
| A_55_P1984556 | NM_011331          | Ccl12     | Chemokine (C-C motif) ligand 12                                                               | -0.7961 | -1.1332 | -2.4540 | 0.0578    | -0.0115   | -0.2458   | 3.21E-05 | 2.6291      |
| A_51_P144770  | BC016099           | Unnown    | hypothetical protein                                                                          | -1.4753 | -1.3236 | -0.9332 | 0.0652    | 0.0281    | 0.3419    | 7.76E-05 | 2.6191      |
| A_55_P2036240 | AK141540           |           | non coding RNA                                                                                | -2.6389 | -2.1206 | -0.7585 | -1.4241   | -0.3656   | 0.3490    | 8.11E-05 | 2.5653      |
| A_51_P315595  | ENSMUST00000082421 | mt-Cytb   | mitochondrially encoded cytochrome b                                                          | -3.7987 | -3.1146 | -3.2954 | -1.9391   | -1.8432   | -2.3944   | 8.46E-05 | 2.5386      |
| A_55_P1979728 | NM_009716          | Atf4      | Activating transcription factor 4                                                             | -1.0190 | -0.8279 | 0.3252  | 0.5817    | 0.6060    | 1.3092    | 1.40E-04 | 2.5307      |
| A_66_P101646  | ENSMUST00000082402 | mt-Co1    | mitochondrially encoded cytochrome c oxidase I                                                | -3.1877 | -2.4049 | -2.2326 | -1.3252   | -1.3063   | -1.2408   | 1.90E-04 | 2.4926      |
| A_55_P2088720 | AK035396           |           | Non coding RNA                                                                                | -2.7010 | -1.9669 | -0.4822 | -1.4985   | -0.1855   | 0.4400    | 1.03E-04 | 2.4657      |
| A_55_P1955279 | NM_001029936       | Specc1    | sperm antigen with calponin homology and coiled-coil domains 1                                | -2.3629 | -2.6486 | -2.4667 | -1.7564   | -1.3788   | -0.4371   | 1.27E-04 | 2.4657      |
| A_51_P409429  | NM_146217          | Aars      | Alanyl-tRNA synthetase                                                                        | 1.2115  | -0.3746 | 1.5659  | 2.1090    | 1.4084    | 2.7714    | 9.29E-05 | 2.4543      |
| A_51_P187901  | NM_024193          | Nol5a     | Nucleolar protein 5A                                                                          | -1.2210 | -1.7217 | -1.3614 | 0.0891    | -0.5120   | -0.0206   | 1.26E-04 | 2.4400      |
| A_55_P1985519 | ENSMUST00000036360 |           | Uncharacterized protein C1orf54 homolog                                                       | -3.6013 | -3.8256 | -3.6363 | -2.6256   | -2.5064   | -2.0828   | 1.23E-04 | 2.4332      |
| A_52_P321318  | ENSMUST00000082408 | mt-Atp6   | mitochondrially encoded ATP synthase 6                                                        | -5.3468 | -4.7780 | -4.6154 | -3.7272   | -3.4776   | -3.6924   | 1.94E-04 | 2.4301      |
| A_52_P200617  | NM_172015          | Iars      | Isoleucine-tRNA synthetase                                                                    | -0.2414 | -0.5074 | 0.7709  | 0.9852    | 0.8557    | 2.0146    | 1.98E-04 | 2.4247      |
| A_55_P1959064 | NM_001083925       | Oas1b     | 2'-5' oligoadenylate synthetase 1B                                                            | -1.8631 | -2.3084 | -2.1525 | -0.5707   | -1.0114   | -0.9094   | 1.09E-04 | 2.4242      |
| A_55_P1968606 | NM_194341          | Ap1gbp1   | AP1 gamma subunit binding protein 1                                                           | -3.3559 | -3.5803 | -3.4090 | -2.3418   | -2.2886   | -1.9102   | 1.50E-04 | 2.4086      |
| A_55_P2053398 | ENSMUST00000078451 | Lirb3     | Cell-surface glycoprotein p91                                                                 | -3.2986 | -3.4302 | -3.2229 | -2.2302   | -2.1930   | -1.7738   | 2.04E-04 | 2.3810      |
| A_66_P115406  | NM_008774          | Pabpc1    | poly(A) binding protein, cytoplasmic 1                                                        | -3.3647 | -2.3729 | -0.3448 | -1.5022   | -1.1307   | 0.2943    | 1.14E-04 | 2.3750      |
| A_55_P1965827 | NM_011664          | Ubb       | ubiquitin B                                                                                   | 0.4276  | 0.4837  | 0.7989  | 2.1964    | 1.3800    | 1.8722    | 2.95E-04 | 2.3720      |
| A_55_P1956063 | NM_026701          | Pbld      | Phenazine biosynthesis-like protein domain containing                                         | -3.6357 | -3.7655 | -3.4152 | -2.6100   | -2.4831   | -2.0251   | 2.50E-04 | 2.3501      |
| A_55_P2065731 | NM_027519          | Medag     | mesenteric estrogen dependent adipogenesis                                                    | -3.3235 | -3.5193 | -3.3535 | -2.2805   | -2.3299   | -1.8907   | 2.43E-04 | 2.3484      |
| A_55_P2060444 | NM_026511          | Apopt1    | apoptogenic, mitochondrial 1                                                                  | -3.5614 | -3.8376 | -3.7146 | -2.7091   | -2.5557   | -2.1771   | 2.05E-04 | 2.3358      |
| A_55_P2114269 | NM_001100116       | Fam177a1  | Protein FAM177A1                                                                              | -3.3181 | -3.5408 | -3.3898 | -2.3818   | -2.2969   | -1.9091   | 2.36E-04 | 2.3300      |
| A_55_P2137941 | NM_052823          | Fxyd2     | FXD domain-containing ion transport regulator 2                                               | -1.5222 | -0.9954 | -0.5964 | -0.0101   | 0.2593    | 0.2813    | 4.24E-04 | 2.3211      |

|               |                    |               |                                                                                                                              |         |         |         |         |         |         |          |        |
|---------------|--------------------|---------------|------------------------------------------------------------------------------------------------------------------------------|---------|---------|---------|---------|---------|---------|----------|--------|
| A_55_P1972263 | BC002231           | Nop56         | nucleolar protein 5A                                                                                                         | -1.8717 | -1.7589 | -1.0111 | -0.4048 | -0.8110 | 0.2091  | 4.78E-04 | 2.3160 |
| A_55_P2117487 | A_55_P2117487      | PabpC1        | Predicted poly(A) binding protein, cytoplasmic 1 (Pabpc1), transcript variant X1                                             | -3.4481 | -2.5041 | -0.4726 | -1.6621 | -1.3040 | 0.1735  | 1.58E-04 | 2.3145 |
| A_55_P2028600 | NM_022410          | Myh9          | Myosin, heavy polypeptide 9, non-muscle                                                                                      | 0.2964  | 0.3734  | 1.8326  | 1.3652  | 1.6218  | 3.1155  | 2.52E-04 | 2.2974 |
| A_55_P2143075 | NM_019639          | Ubc           | Ubiquitin C                                                                                                                  | -1.4384 | -0.4440 | 0.5495  | 0.2421  | 0.3567  | 1.6597  | 5.38E-04 | 2.2928 |
| A_55_P2069935 | NM_052823          | Fxyd2         | FXVD domain-containing ion transport regulator 2                                                                             | -1.6334 | -0.8369 | -0.3250 | 0.0641  | 0.3521  | 0.3769  | 5.93E-04 | 2.2912 |
| A_55_P2034928 | NM_001037925       | LOC625360     | Similar to 2-cell-stage, variable group, member 3                                                                            | -1.0151 | -0.6031 | -1.2157 | 0.0806  | 0.4873  | 0.1826  | 2.63E-04 | 2.2891 |
| A_55_P2092085 | NM_001190327       | Tmsb1         | thymosin, beta 10                                                                                                            | -2.3543 | -2.4158 | -2.5368 | -1.3843 | -1.1134 | -1.2811 | 2.79E-04 | 2.2596 |
| A_55_P2027819 | NM_018860          | Rpl41         | Ribosomal protein L41                                                                                                        | -3.0307 | -2.5386 | -1.7658 | -1.3415 | -1.3593 | -1.1209 | 8.06E-04 | 2.2519 |
| A_51_P228768  | NM_011409          | Slfn3         | schlafen 3                                                                                                                   | -0.5622 | -1.5699 | -2.6861 | 0.0607  | -0.6029 | -0.7722 | 1.14E-04 | 2.2469 |
| A_55_P2153067 | NM_029816          | Orf67         | Uncharacterized protein                                                                                                      | -3.3696 | -3.5388 | -3.1006 | -2.3864 | -2.3443 | -1.7905 | 5.12E-04 | 2.2387 |
| A_55_P1973347 | AK149472           |               | Mus musculus adult male liver tumor cDNA, RIKEN full-length enriched library, clone:C730020H24 product:hypothetical protein, | -2.0797 | -1.5257 | -0.6901 | -0.7295 | -0.1857 | 0.1013  | 6.87E-04 | 2.2354 |
| A_66_P100586  | ENSMUST00000101511 |               | Antisense RNA                                                                                                                | -1.0364 | -0.9016 | -1.8208 | -0.0796 | 0.0032  | -0.2083 | 2.43E-04 | 2.2315 |
| A_52_P533304  | NM_173363          | Eif5          | Eukaryotic translation initiation factor 5                                                                                   | -0.4459 | 0.5538  | 0.6581  | 0.6871  | 1.5645  | 1.9861  | 5.21E-04 | 2.2304 |
| A_52_P684378  | NM_008160          | Gpx1          | glutathione peroxidase 1                                                                                                     | -1.9068 | -2.0263 | -1.5185 | -0.3076 | -0.8689 | -0.8071 | 5.94E-04 | 2.2284 |
| A_52_P533146  | NM_007837          | Ddit3         | DNA-damage inducible transcript 3                                                                                            | -0.6033 | -1.8750 | -1.8215 | 0.3889  | -0.7750 | -0.4476 | 1.62E-04 | 2.2275 |
| A_51_P458384  | NM_175121          | Slc38a2       | solute carrier family 38, member 2                                                                                           | -0.3734 | -0.2465 | 0.2112  | 0.5738  | 0.9514  | 1.5271  | 5.86E-04 | 2.2248 |
| A_55_P1969874 | A_55_P1969874      |               | unknown                                                                                                                      | -3.0765 | -3.3372 | -3.1908 | -2.1692 | -2.1889 | -1.8093 | 5.06E-04 | 2.2125 |
| A_55_P2034740 | NM_144886          | Exosc2        | exosome component 2                                                                                                          | -3.1149 | -3.3012 | -2.8527 | -2.0242 | -2.1444 | -1.6678 | 6.37E-04 | 2.2101 |
| A_52_P49601   | NM_010239          | Fth1          | ferritin heavy chain 1                                                                                                       | -3.6073 | -2.6075 | -1.7070 | -2.0875 | -1.5291 | -0.8733 | 7.86E-04 | 2.2098 |
| A_55_P2072373 | NM_010833          | Msn           | Moesin                                                                                                                       | 1.1105  | 0.1418  | 1.6148  | 1.8173  | 1.6029  | 2.8785  | 4.45E-04 | 2.2097 |
| A_55_P1998811 | A_55_P1998811      | Gm3430        | predicted gene 3430                                                                                                          | -2.6999 | -2.2589 | -0.7320 | -2.0509 | -0.4783 | 0.2672  | 2.86E-04 | 2.2083 |
| A_55_P2105843 | A_55_P2105843      | Gm2371        | predicted gene 2371                                                                                                          | -2.5053 | -2.0118 | -0.7729 | -1.7181 | -0.3863 | 0.2370  | 3.97E-04 | 2.2052 |
| A_55_P2090505 | A_55_P2090505      | Gm4382        | predicted gene 4382                                                                                                          | -2.6708 | -2.1332 | -0.5827 | -1.6043 | -0.5273 | 0.1676  | 4.54E-04 | 2.2051 |
| A_52_P305851  | NM_025880          | LOC668661     | uncharacterized protein LOC668661                                                                                            | -1.3692 | -1.4960 | -1.3929 | -0.3675 | -0.1727 | -0.2972 | 4.33E-04 | 2.2042 |
| A_55_P2078994 | AK136409           | Lrrc31        | leucine rich repeat containing 31                                                                                            | -3.5165 | -3.7478 | -3.6442 | -2.7632 | -2.5610 | -2.1735 | 5.02E-04 | 2.1992 |
| A_51_P241457  | NM_013532          | Lilrb4        | leukocyte immunoglobulin-like receptor, subfamily B, member 4                                                                | -0.9471 | -0.6380 | -0.6690 | 0.6618  | 0.1984  | 0.2741  | 7.59E-04 | 2.1878 |
| A_55_P1999902 | ENSMUST00000107229 | Pip5k1a       | phosphatidylinositol-4-phosphate 5-kinase, type 1 alpha                                                                      | -1.4269 | -2.7517 | -1.7170 | -0.1085 | -1.3690 | -1.0323 | 4.15E-04 | 2.1864 |
| A_55_P2151601 | NM_010156          | Samd9l        | sterile alpha motif domain containing 9-like                                                                                 | -1.6058 | -1.9609 | -1.9021 | -0.6841 | -0.8969 | -0.5405 | 6.01E-04 | 2.1671 |
| A_55_P2081432 | A_55_P2081432      | Gm8953        | 2-cell-stage, variable group, member 3-like pseudogene                                                                       | -0.7985 | -0.9009 | -1.2749 | -0.0376 | 0.1742  | 0.2316  | 4.40E-04 | 2.1647 |
| A_55_P2158281 | A_55_P2158281      |               | Unknown                                                                                                                      | -2.9493 | -3.2837 | -3.2130 | -2.1236 | -2.2001 | -1.7880 | 6.60E-04 | 2.1606 |
| A_55_P2105512 | NM_024193          | Nol5a         | Nucleolar protein 5A                                                                                                         | -1.9749 | -1.9870 | -1.3134 | -0.8010 | -1.0791 | -0.0731 | 1.03E-03 | 2.1545 |
| A_55_P2165234 | NM_001081961       | 2300005B03Rik | Secreted Ly6/uPAR related protein 2                                                                                          | -2.7877 | -0.3561 | -0.5867 | -0.2824 | 0.1899  | -0.3204 | 2.16E-03 | 2.1523 |
| A_51_P246317  | NM_008630          | Mt2           | Mouse metallothionein 2                                                                                                      | -1.4964 | -2.2697 | -0.7406 | 0.4140  | -0.9349 | -0.6774 | 8.65E-04 | 2.1477 |
| A_55_P1953475 | A_55_P1953475      |               | Unknown                                                                                                                      | 0.6882  | 0.6383  | 0.8649  | 2.2078  | 1.4878  | 1.8022  | 9.09E-04 | 2.1467 |
| A_55_P2159740 | NM_001033488       | Mfsd2b        | major facilitator superfamily domain containing 2B                                                                           | -3.3236 | -3.6094 | -3.5707 | -2.6966 | -2.4291 | -2.0724 | 6.02E-04 | 2.1463 |
| A_55_P2093940 | NM_001033451       | Zfp408        | Zinc finger protein 408                                                                                                      | -3.1596 | -3.4810 | -3.3841 | -2.4077 | -2.3652 | -1.9475 | 7.14E-04 | 2.1457 |
| A_51_P385099  | NM_013693          | Tnf           | Tumor necrosis factor                                                                                                        | -0.8158 | -0.6224 | 0.0185  | 0.5834  | 0.5959  | 0.6717  | 1.20E-03 | 2.1291 |
| A_65_P05358   | ENSMUST00000082392 | mt-Nd1        | mitochondrially encoded NADH dehydrogenase 1                                                                                 | -4.5769 | -4.4143 | -3.8298 | -3.7003 | -2.9577 | -2.8987 | 9.98E-04 | 2.1260 |
| A_55_P1957459 | NM_013532          | Lilrb4        | leukocyte immunoglobulin-like receptor, subfamily B, member 4                                                                | -1.1091 | -0.5213 | -0.1747 | 0.8095  | 0.1989  | 0.4400  | 1.68E-03 | 2.1206 |
| A_55_P2136880 | NM_008654          | Ppp1r15a      | protein phosphatase 1, regulatory (inhibitor) subunit 15A                                                                    | -0.6415 | -1.0140 | -0.7233 | 0.5619  | 0.0724  | 0.2376  | 8.10E-04 | 2.1193 |

|               |                    |              |                                                                                   |         |         |         |         |         |         |          |        |
|---------------|--------------------|--------------|-----------------------------------------------------------------------------------|---------|---------|---------|---------|---------|---------|----------|--------|
| A_55_P2063736 | NM_008147          | Gp49a        | glycoprotein 49 A                                                                 | -1.0460 | -0.7392 | -0.8826 | 0.5623  | -0.0060 | 0.0213  | 1.07E-03 | 2.1167 |
| A_55_P1989816 | NM_009565          | Zbtb7b       | Zinc finger and BTB domain containing 7B                                          | -1.1653 | -0.9173 | -0.4408 | 0.0967  | 0.1191  | 0.4995  | 1.31E-03 | 2.1134 |
| A_51_P385099  | NM_013693          | Tnf          | Tumor necrosis factor                                                             | -0.8466 | -0.6107 | -0.0127 | 0.5608  | 0.5408  | 0.6590  | 1.37E-03 | 2.1094 |
| A_52_P683336  | NM_145229          | AY074887     | CDNA sequence AY074887                                                            | -0.6999 | -1.5122 | -1.3745 | 0.0788  | -0.1715 | -0.2705 | 4.77E-04 | 2.1060 |
| A_51_P215887  | NM_019698          | Aldh18a1     | Aldehyde dehydrogenase 18 family, member A1                                       | 0.4278  | -0.1464 | 0.3445  | 1.1880  | 1.1178  | 1.5312  | 9.16E-04 | 2.0999 |
| A_51_P385099  | NM_013693          | Tnf          | Tumor necrosis factor                                                             | -0.8738 | -0.5853 | -0.0152 | 0.5733  | 0.5448  | 0.6125  | 1.53E-03 | 2.0969 |
| A_55_P1983959 | NM_010240          | Ftl1         | ferritin light chain 1                                                            | -3.6904 | -3.1013 | -2.2105 | -2.5398 | -2.2607 | -1.0058 | 1.27E-03 | 2.0926 |
| A_55_P2006467 | NM_011354          | Serf2        | small EDRK-rich factor 2                                                          | -2.3237 | -1.5916 | -1.3626 | -1.1456 | -0.4208 | -0.5169 | 1.21E-03 | 2.0920 |
| A_51_P385099  | NM_013693          | Tnf          | Tumor necrosis factor                                                             | -0.8370 | -0.6604 | -0.0543 | 0.5235  | 0.5164  | 0.5999  | 1.48E-03 | 2.0905 |
| A_51_P217463  | NM_009140          | Cxcl2        | chemokine (C-X-C motif) ligand 2                                                  | -0.3217 | -1.6519 | -1.6100 | 0.7337  | -0.4715 | -0.6595 | 2.57E-04 | 2.0880 |
| A_51_P172853  | NM_009841          | Cd14         | CD14 antigen                                                                      | -0.0604 | 0.4817  | 0.6985  | 1.7812  | 1.2625  | 1.2612  | 1.82E-03 | 2.0874 |
| A_55_P1954925 | NM_177394          | Endov        | endonuclease V                                                                    | -2.8915 | -2.9283 | -3.0182 | -1.9643 | -1.9207 | -1.7680 | 9.97E-04 | 2.0873 |
| A_55_P2108165 | NM_001164289       | Phf11c       | PHD finger protein 11C                                                            | -1.0908 | -0.9331 | -1.1422 | -0.1238 | -0.0053 | 0.1451  | 1.01E-03 | 2.0860 |
| A_55_P2098450 | NM_177214          | Ascc3l1      | Activating signal cointegrator 1 complex subunit 3-like 1                         | -0.0677 | -0.3939 | 0.8375  | 0.5265  | 0.7748  | 2.2537  | 1.03E-03 | 2.0844 |
| A_51_P385099  | NM_013693          | Tnf          | Tumor necrosis factor                                                             | -0.8846 | -0.5656 | -0.0765 | 0.5382  | 0.5479  | 0.5613  | 1.62E-03 | 2.0821 |
| A_51_P385099  | NM_013693          | Tnf          | Tumor necrosis factor                                                             | -0.8716 | -0.6782 | -0.1185 | 0.5166  | 0.4429  | 0.5449  | 1.63E-03 | 2.0814 |
| A_51_P385099  | NM_013693          | Tnf          | Tumor necrosis factor                                                             | -0.8467 | -0.5726 | 0.0145  | 0.5742  | 0.5408  | 0.6519  | 1.69E-03 | 2.0810 |
| A_55_P2109857 | NM_009061          | Rgs2         | Regulator of G-protein signaling 2                                                | -0.0097 | -0.7692 | -0.6012 | 1.4619  | 0.1048  | 0.2231  | 6.81E-04 | 2.0801 |
| A_51_P328442  | NM_033327          | Zfp423       | Zinc finger protein 423                                                           | -4.2768 | 0.6249  | 1.1446  | 0.0656  | 0.2460  | 0.3417  | 1.97E-03 | 2.0756 |
| A_55_P2185712 | NM_009938          | Copa         | Coatamer protein complex subunit alpha                                            | 0.3844  | -0.5498 | 1.0308  | 1.1831  | 0.9052  | 1.9367  | 1.02E-03 | 2.0752 |
| A_55_P2008884 | NM_001003908       | Cltc         | Clathrin, heavy polypeptide (Hc)                                                  | 0.0676  | -0.6053 | 1.2698  | 0.4562  | 0.7084  | 2.7255  | 4.43E-04 | 2.0744 |
| A_55_P2144126 | A_55_P2144126      | Gm3788       | predicted gene 3788                                                               | -2.5367 | -2.6856 | -2.8255 | -1.9200 | -1.4260 | -1.5472 | 7.88E-04 | 2.0728 |
| A_51_P385099  | NM_013693          | Tnf          | Tumor necrosis factor                                                             | -0.8698 | -0.5852 | -0.0114 | 0.5423  | 0.5536  | 0.5791  | 1.79E-03 | 2.0664 |
| A_55_P2039110 | ENSMUST00000082396 | mt-Nd2       | mitochondrially encoded NADH dehydrogenase 2                                      | -4.7745 | -4.3584 | -3.2589 | -3.1977 | -2.8140 | -3.2426 | 2.00E-03 | 2.0646 |
| A_55_P2156394 | NM_001081038       | Btbd16       | BTB (POZ) domain containing 16                                                    | -1.1426 | -1.4648 | -1.2378 | -0.1679 | -0.2919 | -0.2480 | 1.06E-03 | 2.0645 |
| A_51_P265869  | NM_010481          | Hspa9        | Heat shock protein 9                                                              | 0.7469  | 0.5634  | 1.5149  | 2.1706  | 1.4025  | 2.3848  | 1.53E-03 | 2.0623 |
| A_55_P2060111 | ENSMUST00000082407 | mt-Atp8      | mitochondrially encoded ATP synthase 8                                            | -5.3327 | -4.7749 | -4.5777 | -3.9788 | -3.6067 | -3.9706 | 1.53E-03 | 2.0606 |
| A_55_P1978866 | A_55_P1978866      | LOC100039402 | similar to pol protein, 100039402                                                 | -2.4950 | -1.8973 | -0.7472 | -1.6060 | -0.4773 | 0.0692  | 1.01E-03 | 2.0588 |
| A_55_P2094901 | ENSMUST00000085290 | Phyhd1       | phytanoyl-CoA dioxygenase domain containing 1                                     | -3.2774 | -3.5169 | -3.3866 | -2.5954 | -2.3954 | -2.0667 | 1.18E-03 | 2.0578 |
| A_55_P2099358 | NM_013742          | Cars         | CysteinyI-tRNA synthetase                                                         | 0.6173  | -0.6406 | 0.8150  | 1.6818  | 0.5825  | 1.6470  | 8.97E-04 | 2.0560 |
| A_55_P2403453 | NR_028266          |              | non-coding RNA                                                                    | -3.3365 | -0.0177 | 0.4080  | -0.0559 | 0.1906  | 0.0383  | 6.25E-04 | 2.0558 |
| A_52_P431615  | XM_001000891       | Gm1966       | predicted gene                                                                    | -1.1346 | -1.2235 | -1.3409 | 0.0220  | -0.3338 | -0.2747 | 1.10E-03 | 2.0527 |
| A_51_P123625  | NM_008392          | Irg1         | immunoresponsive gene 1                                                           | 0.0401  | 0.1296  | 1.2480  | 1.5281  | 1.1875  | 1.8106  | 2.16E-03 | 2.0508 |
| A_55_P2120577 | NM_010828          | Cited2       | Cbp/p300-interacting transactivator, with Glu/Asp-rich carboxy-terminal domain, 2 | 0.3517  | 0.4027  | 0.6936  | 1.7532  | 1.5065  | 1.2949  | 1.51E-03 | 2.0499 |
| A_51_P253803  | NM_001081117       | Mki67        | antigen identified by monoclonal antibody Ki 67                                   | -1.3086 | -0.5318 | -0.0864 | -0.5275 | 0.3547  | 1.3497  | 1.29E-03 | 2.0485 |
| A_55_P2109486 | NM_001033435       | Milr1        | mast cell immunoglobulin like receptor 1                                          | -2.8240 | -3.0957 | -2.8023 | -1.9261 | -2.0758 | -1.6192 | 1.45E-03 | 2.0471 |
| A_55_P2081530 | NM_080559          | Sh3bgrl3     | SH3 domain binding glutamic acid-rich protein-like 3                              | -0.7186 | -0.7063 | 0.2106  | 0.8269  | 0.4011  | 0.6558  | 2.17E-03 | 2.0459 |
| A_55_P2041265 | NM_144826          | Utp6         | UTP6, small subunit (SSU) processome component, homolog (yeast)                   | -2.9564 | -3.3426 | -3.3843 | -2.3827 | -2.2931 | -1.9147 | 1.10E-03 | 2.0433 |
| A_51_P123625  | NM_008392          | Irg1         | immunoresponsive gene 1                                                           | 0.0164  | 0.1497  | 1.2853  | 1.5346  | 1.1895  | 1.8129  | 2.38E-03 | 2.0400 |
| A_55_P1956973 | NM_011602          | Tln1         | Talin 1                                                                           | -0.5545 | -0.4440 | 0.6086  | 0.2732  | 0.6322  | 1.7893  | 1.57E-03 | 2.0395 |
| A_55_P1973279 | A_55_P1973279      |              | Unknown                                                                           | -3.1812 | -2.5634 | -1.5617 | -1.9823 | -1.6316 | -0.6104 | 1.65E-03 | 2.0382 |
| A_51_P488739  | NM_030701          | Gpr109a      | G protein-coupled receptor 109A                                                   | -0.4075 | -0.7789 | -1.1796 | 0.8978  | 0.0857  | -0.2677 | 6.43E-04 | 2.0381 |
| A_52_P56751   | NM_008879          | Lcp1         | lymphocyte cytosolic protein 1                                                    | 0.8176  | 0.4437  | 1.8606  | 2.0966  | 1.5471  | 2.5519  | 1.56E-03 | 2.0344 |
| A_51_P123625  | NM_008392          | Irg1         | immunoresponsive gene 1                                                           | 0.0494  | 0.1131  | 1.3048  | 1.4885  | 1.1797  | 1.8723  | 2.24E-03 | 2.0341 |

|               |              |         |                                                                               |         |         |         |         |         |         |          |        |
|---------------|--------------|---------|-------------------------------------------------------------------------------|---------|---------|---------|---------|---------|---------|----------|--------|
| A_51_P123625  | NM_008392    | Irg1    | immunoresponsive gene 1                                                       | 0.0696  | 0.0879  | 1.3208  | 1.4770  | 1.2130  | 1.8515  | 2.29E-03 | 2.0295 |
| A_55_P1974178 | NM_175026    | Pyhin1  | Pyrin and HIN domain family, member 1                                         | -0.7262 | -1.0448 | -1.8200 | -0.3156 | -0.0228 | -0.1956 | 6.90E-04 | 2.0265 |
| A_51_P385099  | NM_013693    | Tnf     | Tumor necrosis factor                                                         | -0.8232 | -0.5928 | -0.0405 | 0.5703  | 0.5201  | 0.5053  | 2.25E-03 | 2.0243 |
| A_51_P315555  | NM_027350    | Nars    | Asparaginyl-tRNA synthetase                                                   | 0.8293  | 0.3524  | 0.9691  | 1.7708  | 1.4447  | 1.9870  | 1.60E-03 | 2.0240 |
| A_51_P385099  | NM_013693    | Tnf     | Tumor necrosis factor                                                         | -0.8303 | -0.6645 | -0.0527 | 0.5128  | 0.4867  | 0.5037  | 2.18E-03 | 2.0236 |
| A_55_P2061737 | NM_021278    | Tmsb4x  | thymosin, beta 4, X chromosome                                                | -1.2584 | -2.4899 | -2.5688 | 0.2231  | -1.9424 | -1.5506 | 4.17E-04 | 2.0219 |
| A_51_P345663  | NM_024281    | Rrbp1   | Ribosome binding protein 1                                                    | -0.1444 | -0.5632 | 0.7428  | 0.6046  | 0.6926  | 1.7834  | 1.63E-03 | 2.0211 |
| A_55_P1977917 | NM_001146311 | Cln3    | ceroid lipofuscinosis, neuronal 3, juvenile (Batten, Spielmeyer-Vogt disease) | -1.1536 | -0.6531 | -0.1001 | 0.7083  | 0.1214  | 0.3061  | 3.03E-03 | 2.0198 |
| A_52_P679860  | NM_025992    | Herc6   | hect domain and RLD 6                                                         | -0.6116 | -1.1002 | -0.5932 | 0.4448  | -0.2849 | 0.5718  | 1.68E-03 | 2.0170 |
| A_55_P2011862 | NM_008653    | Mybpc3  | Myosin binding protein C, cardiac                                             | -2.0433 | -2.3499 | -2.2942 | -1.0962 | -1.3946 | -1.1603 | 1.39E-03 | 2.0168 |
| A_51_P185660  | NM_011338    | Ccl9    | Chemokine (C-C motif) ligand 9                                                | -0.0887 | -0.3040 | -0.3855 | 1.5511  | 0.3827  | 0.3202  | 1.22E-03 | 2.0149 |
| A_55_P2008879 | NM_001003908 | Cltc    | Clathrin, heavy polypeptide (Hc)                                              | 0.1590  | -0.4159 | 0.6799  | 0.5509  | 0.7331  | 2.1706  | 1.53E-03 | 2.0146 |
| A_55_P2113256 | NM_181402    | Parp11  | Poly (ADP-ribose) polymerase family, member 11                                | -0.3128 | -1.1534 | -1.6408 | 0.0383  | 0.0643  | -0.1882 | 6.57E-04 | 2.0099 |
| A_51_P123625  | NM_008392    | Irg1    | immunoresponsive gene 1                                                       | 0.0634  | 0.1183  | 1.3241  | 1.5072  | 1.1827  | 1.8327  | 2.61E-03 | 2.0077 |
| A_51_P327295  | NM_021473    | Akr1a1  | aldo-keto reductase family 1, member A1                                       | -0.3073 | 0.2381  | 0.1777  | 1.0857  | 0.9324  | 1.1040  | 2.23E-03 | 2.0063 |
| A_55_P2082733 | NM_007807    | Cybb    | Cytochrome b-245, beta polypeptide                                            | -0.1315 | -0.2319 | 0.5688  | 0.8230  | 0.9934  | 1.4022  | 2.10E-03 | 2.0061 |
| A_55_P1985422 | TC1700876    | Unknown | Erythroid differentiation regulator, partial (43%)                            | -2.0395 | -1.8954 | -1.4686 | -1.0428 | -0.6531 | -0.6952 | 1.88E-03 | 2.0057 |
| A_55_P2152926 | NM_016776    | Mybbp1a | MYB binding protein (P160) 1a                                                 | 0.4729  | -0.5388 | 1.6811  | 1.5497  | 0.8999  | 2.1755  | 9.13E-04 | 2.0046 |
| A_51_P362054  | NM_025983    | Atp5e   | ATP synthase, H+ transporting, mitochondrial F1 complex, epsilon subunit      | -2.8657 | -1.7359 | -1.7341 | -1.7654 | -0.9112 | -0.6569 | 1.88E-03 | 2.0010 |
