# Supplementary material for: Inhibition of Sec61-dependent translocation by mycolactone uncouples the integrated stress response from ER stress, driving cytotoxicity via translational activation of ATF4
Source: PubMed Central journal article supplement (PMC5852046; doi:10.1038/s41419-018-0427-y), 2018-03-14
Supplement: 41419_2018_427_MOESM4_ESM.pdf [file 41419_2018_427_MOESM4_ESM.pdf]

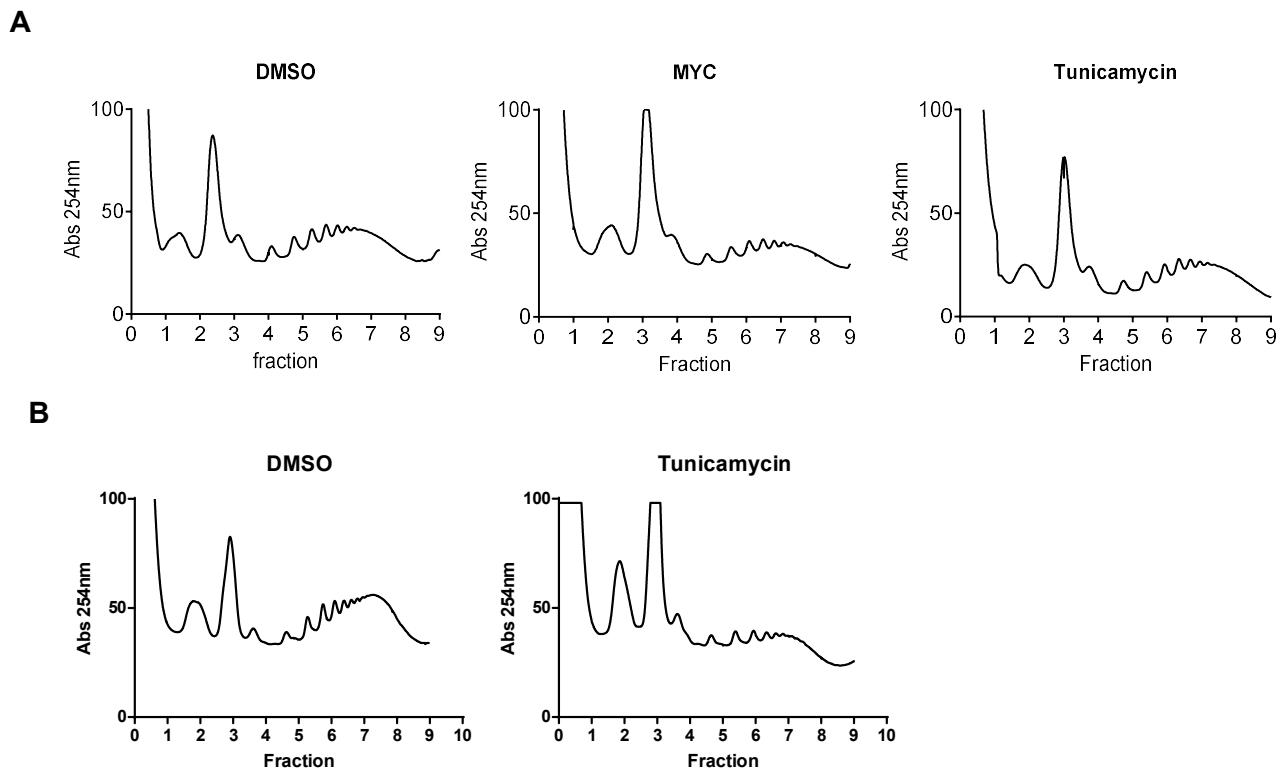

Fig. S1
