# Supplementary material for: Inhibition of Sec61-dependent translocation by mycolactone uncouples the integrated stress response from ER stress, driving cytotoxicity via translational activation of ATF4
Source: Cell Death Dis. 2018 Mar 14;9(3):397. doi: 10.1038/s41419-018-0427-y (PMC5852046; doi:10.1038/s41419-018-0427-y)
Supplement: Supplementary file 8 — Figure S5(PDF 15 kb) [file 41419_2018_427_MOESM8_ESM.pdf]

A

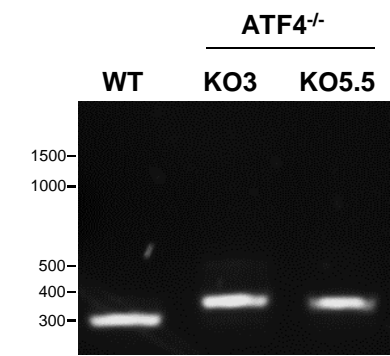

B

|       |                           |                                                                      |               |                      |                      |          |        |    |
|-------|---------------------------|----------------------------------------------------------------------|---------------|----------------------|----------------------|----------|--------|----|
|       |                           | 5' TGCCCCCTAGTCCAGGAGACTAATAAGCAGCCC                                 |               | CCCCAGACGGTGAACCCAAT | TGGCCATCTCCC         | 3'       | PAM    |    |
|       |                           |                                                                      |               |                      |                      |          |        |    |
|       |                           | 3' ACGGGGGGATCAGGTCCTCTGATTATTCGTCGGGGGGTCTGCCACTTGGGTTAACCGGTAGAGGG |               | 5'                   |                      |          |        |    |
|       |                           | PAM                                                                  |               |                      |                      |          |        |    |
| ID    | SEQUENCE                  |                                                                      |               |                      |                      |          |        |    |
|       | 5'                        |                                                                      |               |                      |                      |          |        | 3' |
| WT    | TGCCCCCTAGTCCAGGAGACTAATA | INS40NT                                                              | AGCAGCCC      | CCCCAGACGGTGAACCCAAT | TGGCCATC             |          |        |    |
| KO3   | TGCCCCCTAGTCCAGGAGACTAATA | XXXXXXXXXXXXXXXXXXXXXXXXXXXX                                         | CAGGAGACTAATA | AGCAGCCC             | CCCCAGACGGTGAACCCAAT | TGGCCATC | ALLELE | 1  |
| WT    | TGCCCCCTAGTCCAGGAGACTAATA | INS43NT                                                              | AGCAGCCC      | CCCCAGACGGTGAACCCAAT | TGGCCATC             |          |        |    |
| KO3   | TGCCCCCTAGTCCAGGAGACTAATA | XXXXXXXXXXXXXXXXXXXXXXXXXXXX                                         | XAGGAGACTAATA | AGCAGCCC             | CCCCAGACGGTGAACCCAAT | TGGCCATC | ALLELE | 2  |
| WT    | TGCCCCCTAGTCCAGGAGACTAATA | INS41NT                                                              | AGCAGCCC      | CCCCAGACGGTGAACCCAAT | TGGCCATC             |          |        |    |
| KO5.5 | TGCCCCCTAGTCCAGGAGACTAATA | XXXXXXXXXXXXXXXXXXXXXXXXXXXX                                         | CAGGAGACTAATA | AGCAGCCC             | CCCCAGACGGTGAACCCAAT | TGGCCATC | ALLELE | 1  |
| WT    | TGCCCCCTAGTCCAGGAGACTAATA | INS44NT                                                              | AGCAGCCC      | CCCCAGACGGTGAACCCAAT | TGGCCATC             |          |        |    |
| KO5.5 | TGCCCCCTAGTCCAGGAGACTAATA | XXXXXXXXXXXXXXXXXXXXXXXXXXXX                                         | CAGGAGACTAATA | AGCAGCCC             | CCCCAGACGGTGAACCCAAT | TGGCCATC | ALLELE | 2  |

Fig. S5
